# Supplementary material for: Benefits of Parent Training in the Rehabilitation of Deaf or Hard of Hearing Children of Hearing Parents: A Systematic Review
Source: MDPI journal article supplement (doi:10.3390/audiolres11040060), 2021-12-13
Supplement: s1 [file s1]

**Table S1.** Search strategies used in the systematic review.

| Database           | Search string                                                                                                                                                                                                                                                                                                                                                                                                                                                                                                                                       |
|--------------------|-----------------------------------------------------------------------------------------------------------------------------------------------------------------------------------------------------------------------------------------------------------------------------------------------------------------------------------------------------------------------------------------------------------------------------------------------------------------------------------------------------------------------------------------------------|
| PubMed             | ("deaf*" OR "hearing impair*" OR "hearing loss" OR "hard of hearing" OR "D/HH" OR "DHH" OR "Persons With Hearing Impairments"[MeSH Terms] OR "Hearing Loss"[MeSH Terms]) AND ("child*" OR "infant*" OR "Child"[MeSH Terms] OR "Infant"[MeSH Terms]) AND ("hearing aid*" OR "cochlear implant*" OR "Hearing Aids"[MeSH Terms] OR "Cochlear Implants"[MeSH Terms]) AND ("course*" OR "parent training" OR "training course*" OR "parent coaching" OR "parent implemented treatment")                                                                  |
| Scopus             | TITLE-ABS-KEY("deaf*" OR "hearing impair*" OR "hearing loss" OR "hard of hearing" OR "D/HH" OR "DHH") AND TITLE-ABS-KEY("child*" OR "infant*") AND TITLE-ABS-KEY("cochlear implant*" OR "hearing aid*") AND TITLE-ABS-KEY("course*" OR "parent training" OR "training course*" OR "parent coaching" OR "parent implemented treatment")                                                                                                                                                                                                              |
| Web of Science     | TS=("deaf*" OR "hearing impair*" OR "hearing loss" OR "hard of hearing" OR "D/HH" OR "DHH") AND TS=("child*" OR "infant*") AND TS=("cochlear implant*" OR "hearing aid*") AND TS=("course*" OR "parent training" OR "training course*" OR "parent coaching" OR "parent implemented treatment")                                                                                                                                                                                                                                                      |
| Cochrane Library   | ((("deaf*" OR "hearing impair*" OR "hearing loss" OR "hard of hearing" OR "DHH"):ti,ab,kw OR "Persons With Hearing Impairments"[MeSH Descriptor] OR "Hearing Loss"[MeSH Descriptor]) AND ((("child*" OR "infant*"):ti,ab,kw OR "Child"[MeSH Descriptor] OR "Infant"[MeSH Descriptor]) AND ((("cochlear implant*" OR "hearing aid*"):ti,ab,kw OR "Hearing Aids"[MeSH Descriptor] OR "Cochlear Implants"[MeSH Descriptor]) AND ("course*" OR "parent training" OR "training course*" OR "parent coaching" OR "parent implemented treatment"):ti,ab,kw |
| CINHAL Database    | ("deaf*" OR "hearing impair*" OR "hearing loss" OR "hard of hearing" OR "D/HH" OR "DHH" OR (MM "Hearing Loss, Partial+") OR (MM "Deafness+")) AND ("child*" OR "infant*" OR (MM "Child+") OR (MM "Infant+")) AND ("hearing aid*" OR "cochlear implant*" OR (MM "Hearing Aids+") OR (MM "Cochlear Implant+")) AND ("course*" OR "parent training" OR "training course*" OR "parent coaching" OR "parent implemented treatment")                                                                                                                      |
| ISRCTN Registry    | ("deaf*" OR "hearing impair*" OR "hearing loss" OR "hard of hearing" OR "D/HH" OR "DHH") AND ("child*" OR "infant*") AND ("hearing aid*" OR "cochlear implant*") AND ("course*" OR "parent training" OR "training course*" OR "parent coaching" OR "parent implemented treatment")                                                                                                                                                                                                                                                                  |
| ClinicalTrials.gov | ("deaf*" OR "hearing impair*" OR "hearing loss" OR "hard of hearing" OR "D/HH" OR "DHH") AND ("child*" OR "infant*") AND ("hearing aid*" OR "cochlear implant*") AND ("course*" OR "parent training" OR "training course*" OR "parent coaching" OR "parent implemented treatment")                                                                                                                                                                                                                                                                  |
